# Supplementary material for: Further utilization of a Mn redox reaction via control of structural disorder in olivine systems
Source: Royal Society of Chemistry journal article supplement (doi:10.1039/c8ta03631d), 2018-01-01
Supplement: c8ta03631d1.pdf [file c8ta03631d1.pdf]

## Electronic Supplementary Information

### Further utilization of Mn redox reaction via control of structural disorder in olivine system

Yunok Kim<sup>a</sup>, Jaeseung Yoo<sup>a</sup>, Donghyuk Jang<sup>a</sup>, Shoaib Muhammad<sup>a</sup>, Mihee Jeong<sup>a</sup>, Woosung Choi<sup>a</sup>, Won-Sub Yoon<sup>a,\*</sup>

<sup>a</sup>. Department of Energy Science, Sungkyunkwan University, Suwon 440-746, South Korea.

\* E-mail: wsyoon@skku.edu; Tel: +82 31-2996276; Fax: +82 31-2994279.

Electronic Supplementary Information (ESI) available: [details of any supplementary information available should be included here]. See DOI: 10.1039/x0xx00000x

Table S1: Calculated voltage difference between Fe and Mn cathodic and anodic redox peaks at various C-rates.

| C-rate | Sample    | $\Delta V (\text{Fe}^{2+}/\text{Fe}^{3+})$ | $\Delta V (\text{Mn}^{2+}/\text{Mn}^{3+})$ |
|--------|-----------|--------------------------------------------|--------------------------------------------|
| C/5    | LFMP-S    | 0.0483                                     | 0.0909                                     |
|        | LFMP-NS   | 0.0390                                     | 0.0717                                     |
|        | LFMP-NSCr | 0.0292                                     | 0.0512                                     |
| C/3    | LFMP-S    | 0.0541                                     | 0.0969                                     |
|        | LFMP-NS   | 0.0352                                     | 0.0742                                     |
|        | LFMP-NSCr | 0.0299                                     | 0.0551                                     |
| 1C     | LFMP-S    | 0.0594                                     | 0.1143                                     |
|        | LFMP-NS   | 0.0518                                     | 0.1126                                     |
|        | LFMP-NSCr | 0.0443                                     | 0.0721                                     |

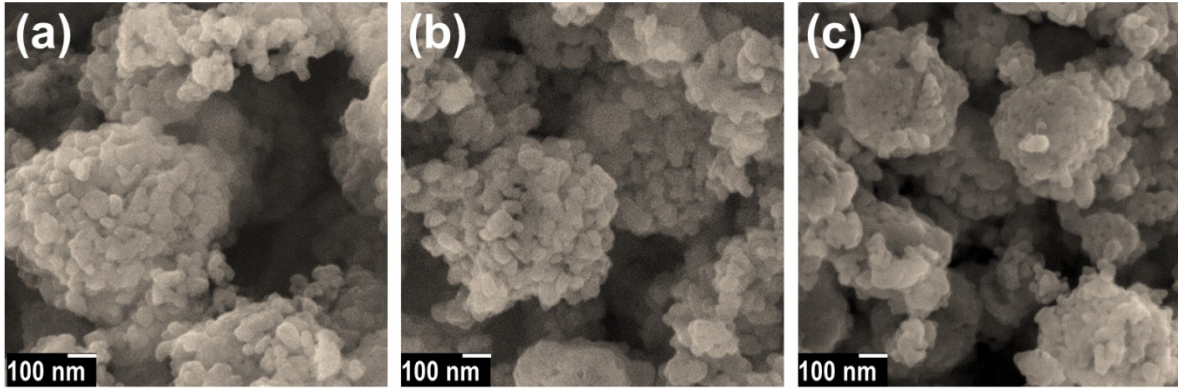

*Figure S1: SEM images of (a) LFMP-S, (b) LFMP-NS, (c) LFMP-NSCr powder samples.*

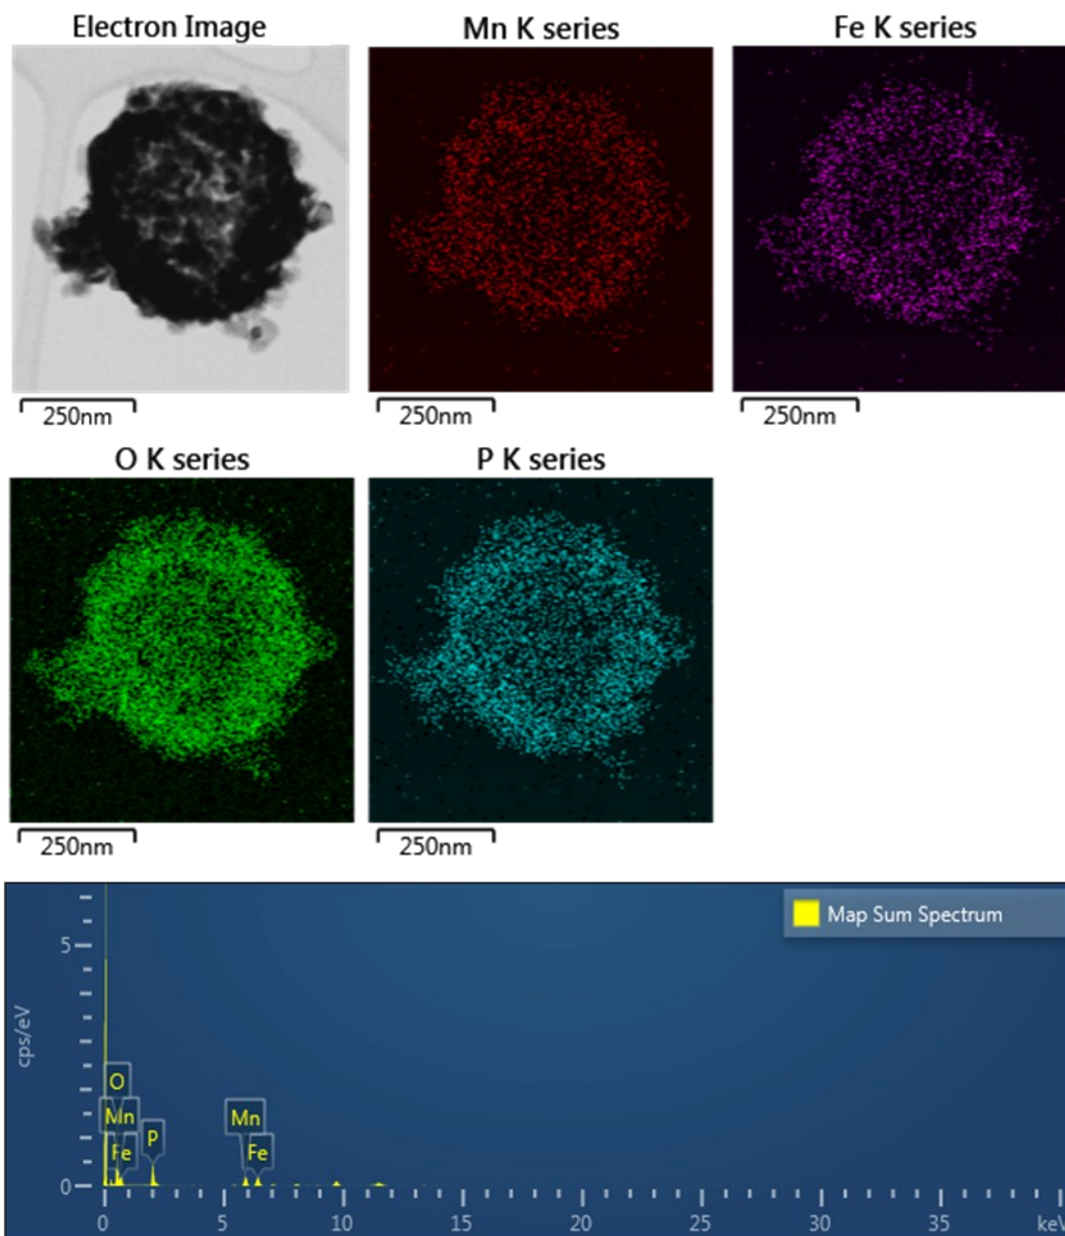

Figure S2: EDX and EDS mapping of LFMP-S powder samples.

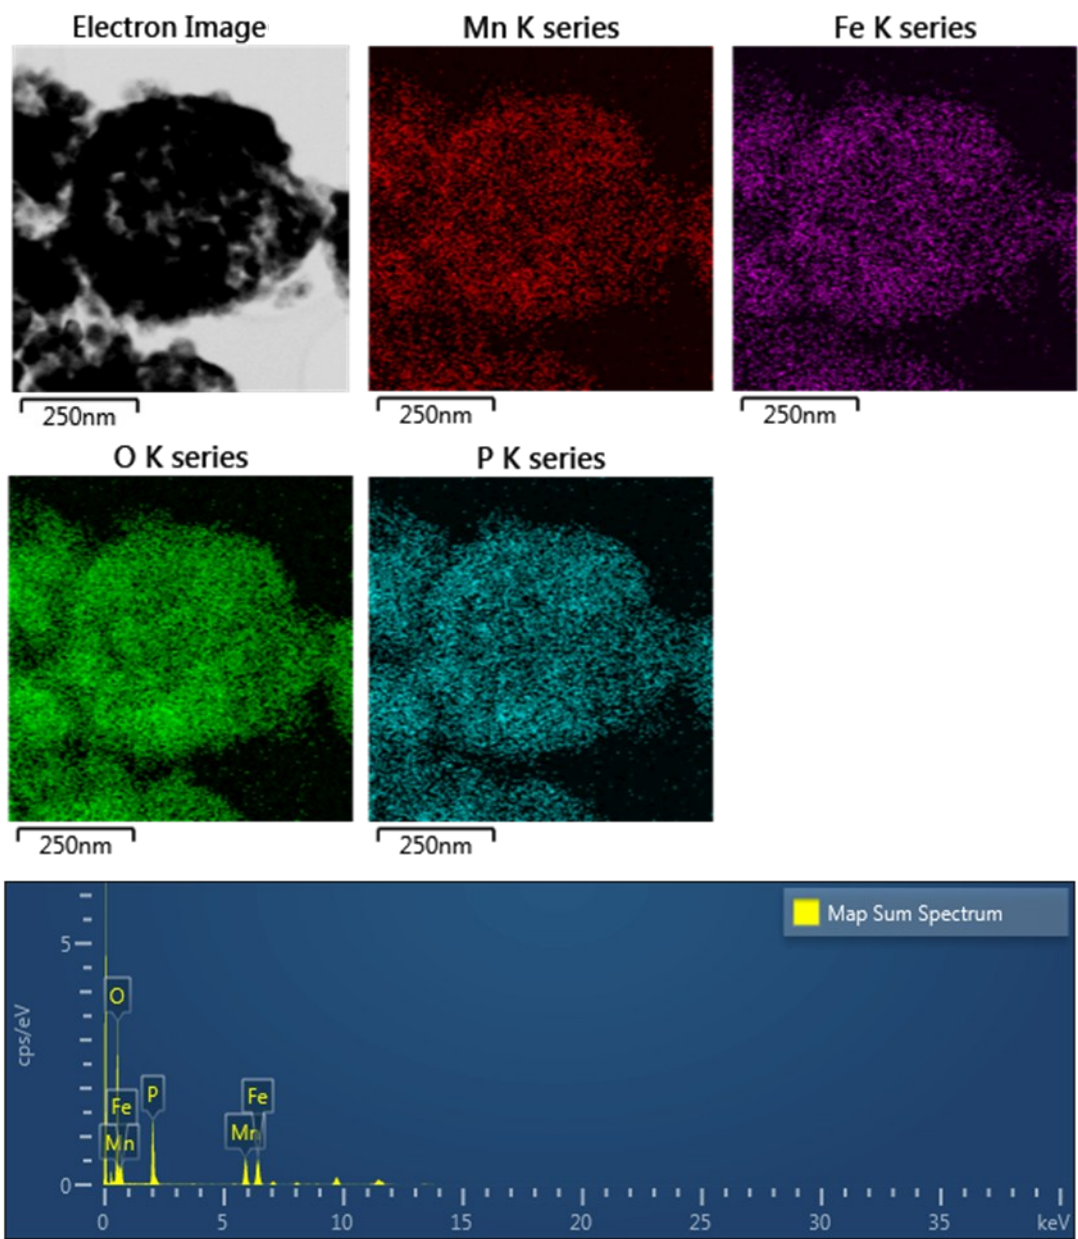

Figure S3: EDX and EDS mapping of LFMP-NS powder samples.

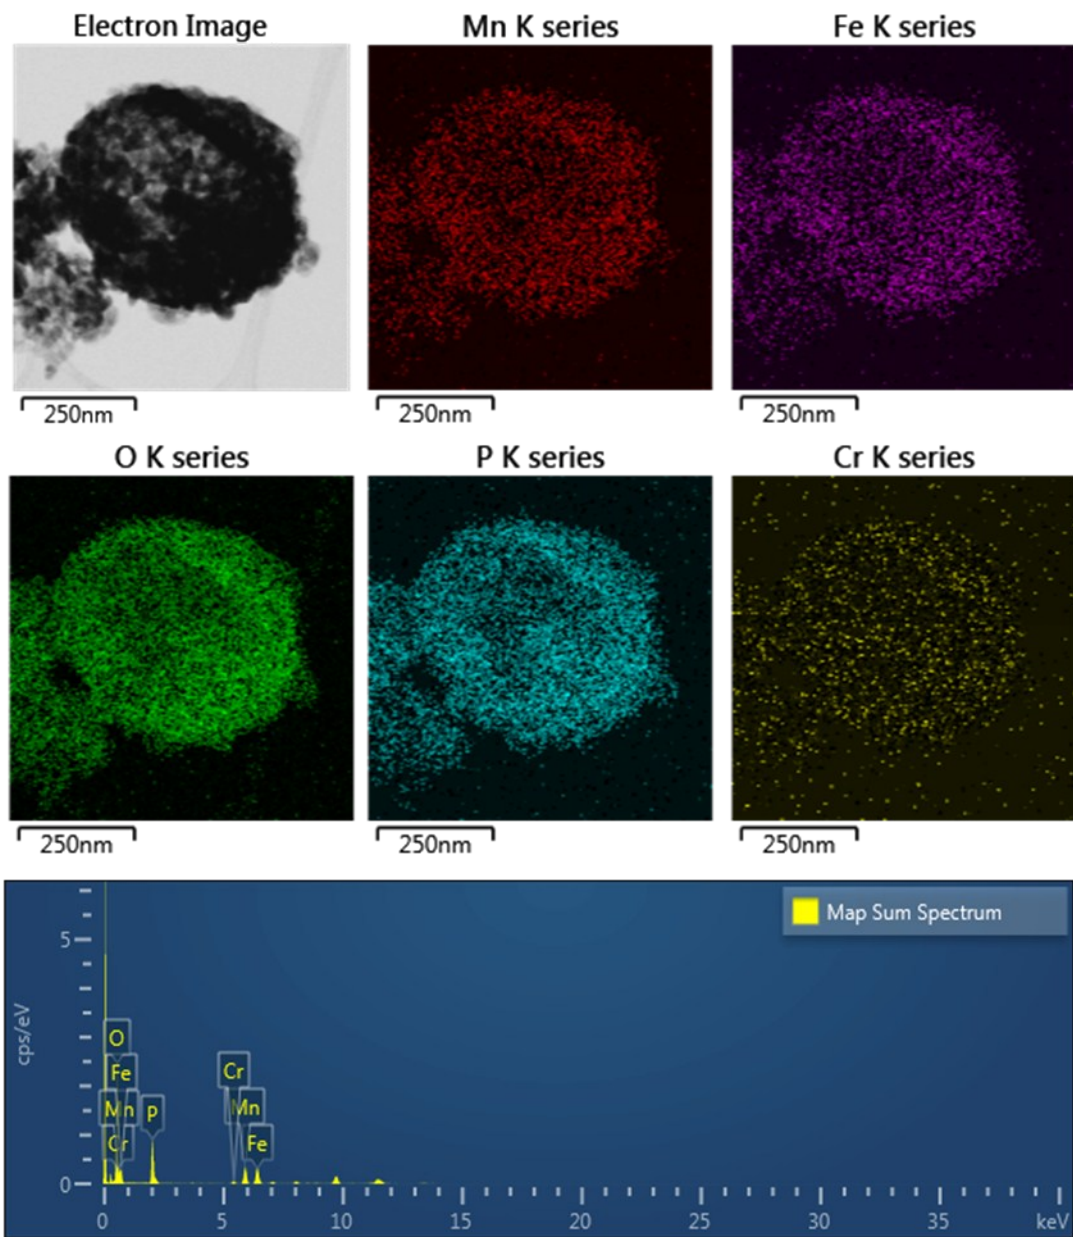

Figure S4: EDX and EDS mapping of LFMP-NsCr powder samples.

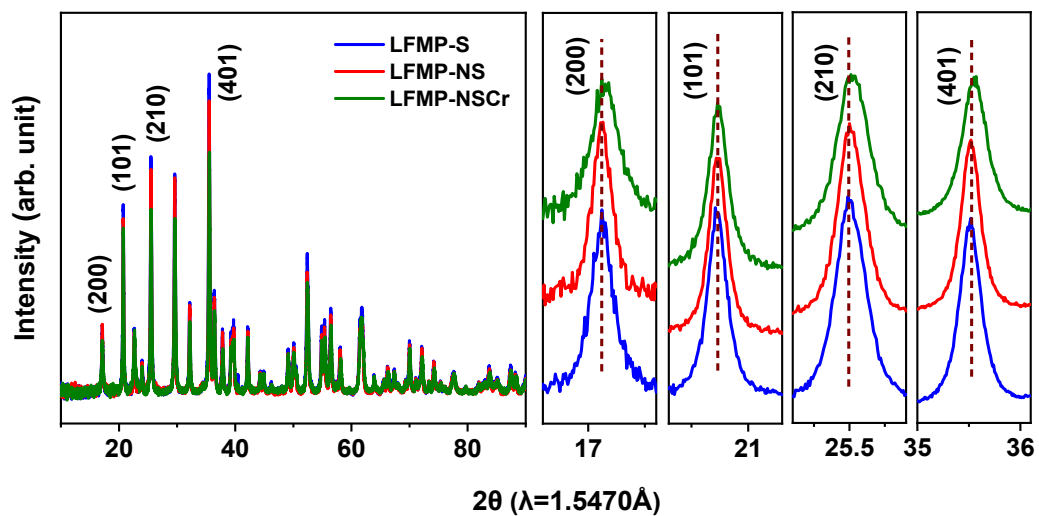

Figure S5: HRPD patterns of LFMP-S, NS, and NSCr powder samples with selected enlarged Bragg peaks.

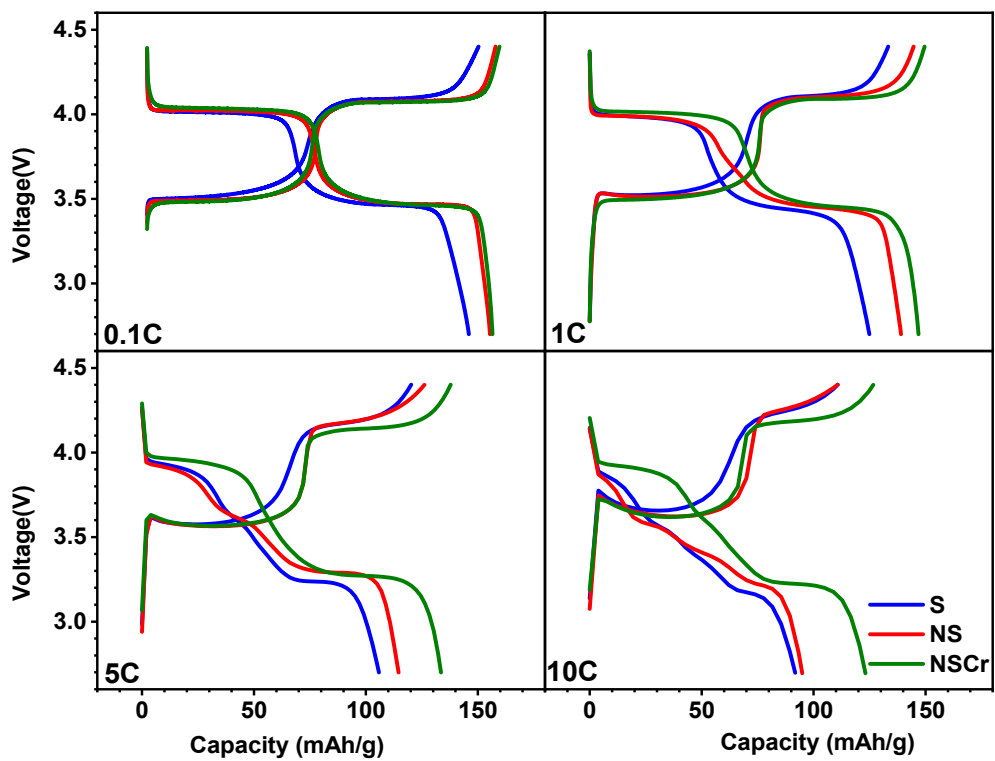

Figure S6: The electrochemical charge and discharge profiles of the LFMP-S, NS and NSCr electrodes at 0.1C, 1C, 5C, and 10C.



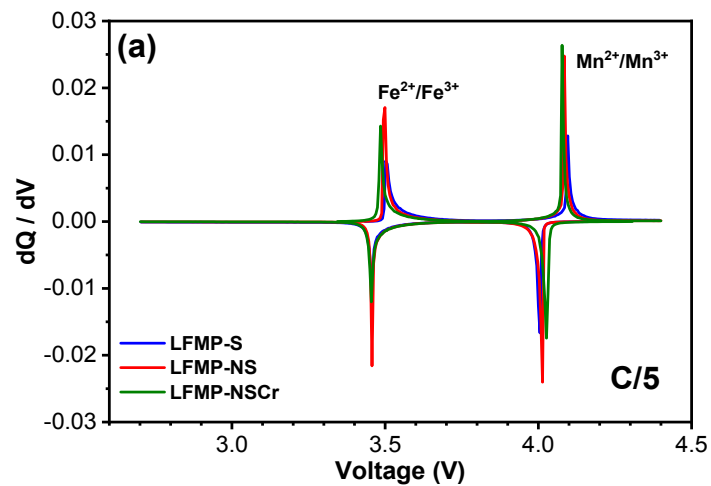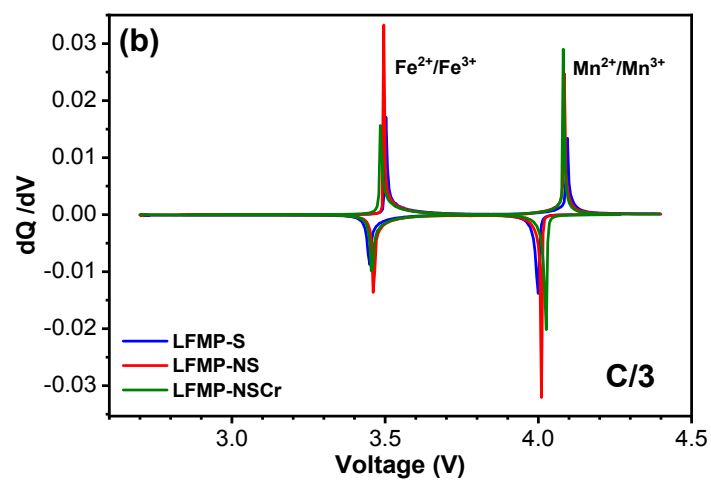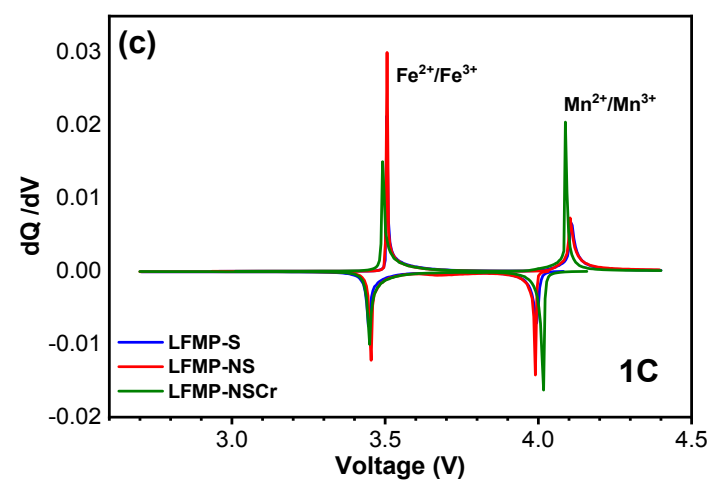

Figure S7:  $dQ/dV$  curves of LFMP-S, NS and NSCr electrodes at different C-rates of (a) C/5, (b) C/3, and (c) 1C.

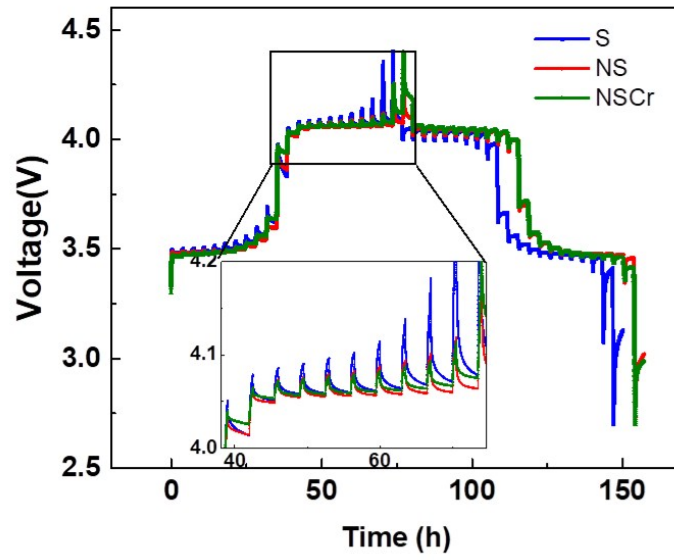

Figure S8: GITT curves of the LFMP-S, NS, and NSCr electrodes measured during 1<sup>st</sup> cycle.
